# Supplementary material for: Triazole-induced planarization of a twisted tetrazole-based molecule towards energetic materials with improved thermostability and insensitivity
Source: Royal Society of Chemistry journal article supplement (doi:10.1039/d3dt01416a), 2023-01-01
Supplement: d3dt01416a1.pdf [file d3dt01416a1.pdf]

## Electronic Supplementary Information

# Triazole-Induced Planarization of A Twisted Tetrazole-based Molecule towards Energetic Materials With Improved Thermostability and Insensitivity

Zhaoyang Yin, <sup>1a</sup> Lijincao Hu, <sup>1a</sup> Wei Huang, <sup>\*a</sup> Yuji Liu and Yongxing Tang <sup>\*a</sup>

<sup>a</sup> School of Chemistry and Chemical Engineering, Nanjing University of Science and Technology, Nanjing 210094 (China). E-mail: [huang\\_wei@njust.edu.cn](mailto:huang_wei@njust.edu.cn), [yongxing@njust.edu.cn](mailto:yongxing@njust.edu.cn).

<sup>1</sup> These authors contributed equally to this work.

|                                            |     |
|--------------------------------------------|-----|
| Crystal structure analysis                 | S3  |
| General methods                            | S12 |
| Computational methods                      | S12 |
| Crystal detection methods                  | S13 |
| Calculation details for heats of formation | S13 |
| NMR plots                                  | S14 |
| DSC plots                                  | S23 |

## Crystal structure analysis

**Table S1.** Crystallographic data and structure determination details for **3·DMF** and **4·H<sub>2</sub>O**.

| Parameters                               | 3·DMF              | 4·H <sub>2</sub> O |
|------------------------------------------|--------------------|--------------------|
| CCDC                                     | 2241992            | 2241993            |
| $D_{\text{calc.}}$ (g cm <sup>-3</sup> ) | 1.610              | 1.729              |
| $T$ (K)                                  | 193                | 193                |
| Crystal system                           | Monoclinic         | Monoclinic         |
| Space group                              | P2 <sub>1</sub> /c | Cc                 |
| $a$ (Å)                                  | 3.7982(3)          | 3.66370(10)        |
| $b$ (Å)                                  | 25.3702(15)        | 24.8780(5)         |
| $c$ (Å)                                  | 12.2141(7)         | 12.5043(3)         |
| $\alpha$ (°)                             | 90                 | 90                 |
| $\beta$ (°)                              | 91.171(4)          | 93.1820(10)        |
| $\gamma$ (°)                             | 90                 | 90                 |
| $V$ (Å <sup>3</sup> )                    | 1176.72(13)        | 1137.95(5)         |
| $Z$                                      | 4                  | 8                  |
| $2\theta_{\text{min}}$ °                 | 6.968              | 7.106              |
| $2\theta_{\text{max}}$ °                 | 136.768            | 136.194            |
| GoF                                      | 1.090              | 1.091              |
| wR <sub>2</sub> (all data)               | 0.2714             | 0.0597             |
| wR <sub>2</sub> [ $I > 2\sigma(I)$ ]     | 0.2577             | 0.0592             |
| R <sub>1</sub> (all data)                | 0.1106             | 0.0248             |
| R <sub>1</sub> [ $I > 2\sigma(I)$ ]      | 0.0940             | 0.0243             |

**Table S2.** Bond lengths [ $\text{\AA}$ ] for  $3 \cdot \text{DMF}$ .

| <b>Atom</b> | <b>Atom</b> | <b>Length/<math>\text{\AA}</math></b> | <b>Atom</b> | <b>Atom</b> | <b>Length/<math>\text{\AA}</math></b> |
|-------------|-------------|---------------------------------------|-------------|-------------|---------------------------------------|
| O(1)        | N(11)       | 1.232(5)                              | N(5)        | C(3)        | 1.386(5)                              |
| O(2)        | N(11)       | 1.217(5)                              | N(6)        | N(9)        | 1.361(5)                              |
| N(1)        | N(11)       | 1.343(5)                              | N(6)        | C(3)        | 1.332(6)                              |
| N(1)        | C(1)        | 1.375(5)                              | N(7)        | N(8)        | 1.365(5)                              |
| N(2)        | C(1)        | 1.369(6)                              | N(7)        | C(3)        | 1.303(6)                              |
| N(2)        | C(2)        | 1.330(5)                              | N(8)        | N(9)        | 1.294(5)                              |
| N(3)        | N(5)        | 1.397(5)                              | O(3)        | C(4)        | 1.246(6)                              |
| N(3)        | C(1)        | 1.308(6)                              | N(10)       | C(4)        | 1.310(6)                              |
| N(4)        | C(2)        | 1.314(6)                              | N(10)       | C(5)        | 1.457(6)                              |
| N(5)        | C(2)        | 1.370(5)                              | N(10)       | C(6)        | 1.453(6)                              |

**Table S3.** Bond angles [°] for **3**·DMF.

| <b>Atom</b> | <b>Atom</b> | <b>Atom</b> | <b>Angle/°</b> | <b>Atom</b> | <b>Atom</b> | <b>Atom</b> | <b>Angle/°</b> |
|-------------|-------------|-------------|----------------|-------------|-------------|-------------|----------------|
| N(11)       | N(1)        | C(1)        | 126.4(4)       | N(2)        | C(1)        | N(1)        | 114.8(4)       |
| C(2)        | N(2)        | C(1)        | 103.4(3)       | N(3)        | C(1)        | N(1)        | 128.2(4)       |
| C(1)        | N(3)        | N(5)        | 100.5(3)       | N(3)        | C(1)        | N(2)        | 117.0(4)       |
| C(2)        | N(5)        | N(3)        | 110.7(3)       | N(2)        | C(2)        | N(5)        | 108.4(3)       |
| C(2)        | N(5)        | C(3)        | 127.4(4)       | N(4)        | C(2)        | N(2)        | 126.9(4)       |
| C(3)        | N(5)        | N(3)        | 121.7(3)       | N(4)        | C(2)        | N(5)        | 124.7(4)       |
| C(3)        | N(6)        | N(9)        | 106.0(3)       | N(6)        | C(3)        | N(5)        | 123.5(4)       |
| C(3)        | N(7)        | N(8)        | 104.4(4)       | N(7)        | C(3)        | N(5)        | 124.9(4)       |
| N(9)        | N(8)        | N(7)        | 110.9(3)       | N(7)        | C(3)        | N(6)        | 111.6(4)       |
| N(8)        | N(9)        | N(6)        | 107.1(3)       | C(4)        | N(10)       | C(5)        | 121.0(4)       |
| O(1)        | N(11)       | N(1)        | 116.0(4)       | C(4)        | N(10)       | C(6)        | 120.6(4)       |
| O(2)        | N(11)       | O(1)        | 125.5(4)       | C(6)        | N(10)       | C(5)        | 118.4(4)       |
| O(2)        | N(11)       | N(1)        | 118.5(4)       | O(3)        | C(4)        | N(10)       | 123.6(4)       |

**Table S4.** Torsion angles [°] for **3**·DMF.

| <b>A</b>   | <b>B</b> | <b>C</b>   | <b>D</b> | <b>Angle/°</b> | <b>A</b> | <b>B</b> | <b>C</b> | <b>D</b> | <b>Angle/°</b> |
|------------|----------|------------|----------|----------------|----------|----------|----------|----------|----------------|
| N(3)       | N(5)     | C(2)       | N(2)     | 1.1(5)         | C(1)     | N(2)     | C(2)     | N(4)     | 179.6(5)       |
| N(3)       | N(5)     | C(2)       | N(4)     | -179.4(4)      | C(1)     | N(2)     | C(2)     | N(5)     | -0.8(5)        |
| N(3)       | N(5)     | C(3)       | N(6)     | -3.2(7)        | C(1)     | N(3)     | N(5)     | C(2)     | -0.8(5)        |
| N(3)       | N(5)     | C(3)       | N(7)     | 177.1(4)       | C(1)     | N(3)     | N(5)     | C(3)     | -176.4(4)      |
| N(5)       | N(3)     | C(1)       | N(1)     | -179.2(5)      | C(2)     | N(2)     | C(1)     | N(1)     | 179.9(4)       |
| N(5)       | N(3)     | C(1)       | N(2)     | 0.3(5)         | C(2)     | N(2)     | C(1)     | N(3)     | 0.4(6)         |
| N(7)       | N(8)     | N(9)       | N(6)     | 0.3(5)         | C(2)     | N(5)     | C(3)     | N(6)     | -178.0(4)      |
| N(8)       | N(7)     | C(3)       | N(5)     | -180.0(4)      | C(2)     | N(5)     | C(3)     | N(7)     | 2.4(8)         |
| N(8)       | N(7)     | C(3)       | N(6)     | 0.4(5)         | C(3)     | N(5)     | C(2)     | N(2)     | 176.3(4)       |
| N(9)       | N(6)     | C(3)       | N(5)     | -179.9(4)      | C(3)     | N(5)     | C(2)     | N(4)     | -4.1(8)        |
| N(9)       | N(6)     | C(3)       | N(7)     | -0.2(5)        | C(3)     | N(6)     | N(9)     | N(8)     | 0.0(5)         |
| N(11)<br>) | N(1)     | C(1)       | N(2)     | 178.9(5)       | C(3)     | N(7)     | N(8)     | N(9)     | -0.4(5)        |
| N(11)<br>) | N(1)     | C(1)       | N(3)     | -1.6(9)        | C(5)     | N(10)    | C(4)     | O(3)     | 178.7(5)       |
| C(1)       | N(1)     | N(11)<br>) | O(1)     | 179.3(5)       | C(6)     | N(10)    | C(4)     | O(3)     | -0.5(8)        |
| C(1)       | N(1)     | N(11)<br>) | O(2)     | -1.7(8)        | C6       | N7A      | N8       | O3       |                |

**Table S5.** Hydrogen bonds for **3**·DMF [ $\text{\AA}$  and  $^\circ$ ].

| <b>D</b> | <b>H</b> | <b>A</b>        | <b>d(D-H)/<math>\text{\AA}</math></b> | <b>d(H-A)/<math>\text{\AA}</math></b> | <b>d(D-A)/<math>\text{\AA}</math></b> | <b>D-H-A/<math>^\circ</math></b> |
|----------|----------|-----------------|---------------------------------------|---------------------------------------|---------------------------------------|----------------------------------|
| N4       | H4A      | N7              | 0.85(6)                               | 2.25(6)                               | 2.859(6)                              | 129(5)                           |
| N6       | H6       | O3 <sup>1</sup> | 0.82(6)                               | 1.76(6)                               | 2.558(5)                              | 167(5)                           |
| N1       | H1       | N2 <sup>2</sup> | 0.92(6)                               | 1.93(6)                               | 2.801(6)                              | 157(5)                           |

<sup>1</sup>-1+X,+Y,+Z; <sup>2</sup>2-X,1-Y,1-Z.

**Table S6.** Bond lengths [ $\text{\AA}$ ] for  $4 \cdot \text{H}_2\text{O}$ .

| <b>Atom</b> | <b>Atom</b> | <b>Length/<math>\text{\AA}</math></b> | <b>Atom</b> | <b>Atom</b> | <b>Length/<math>\text{\AA}</math></b> |
|-------------|-------------|---------------------------------------|-------------|-------------|---------------------------------------|
| O1          | N12         | 1.416(2)                              | N6          | N5          | 1.404(3)                              |
| O3          | N9          | 1.274(2)                              | N6          | C3          | 1.322(3)                              |
| O2          | N9          | 1.244(3)                              | N10         | C3          | 1.390(3)                              |
| O4          | N11         | 1.406(3)                              | N5          | C1          | 1.393(3)                              |
| N7          | C3          | 1.377(3)                              | N5          | C2          | 1.362(3)                              |
| N7          | C2          | 1.330(3)                              | N1          | N2          | 1.300(3)                              |
| N3          | N2          | 1.352(3)                              | N1          | N4          | 1.356(3)                              |
| N3          | C1          | 1.321(3)                              | N4          | C1          | 1.335(3)                              |
| N9          | N10         | 1.301(3)                              | N8          | C2          | 1.332(3)                              |



**Table S7.** Bond angles [°] for 4·H<sub>2</sub>O.

| Atom | Atom | Atom | Angle/°    | Atom | Atom | Atom | Angle/°    |
|------|------|------|------------|------|------|------|------------|
| C2   | N7   | C3   | 103.64(19) | N1   | N2   | N3   | 109.30(19) |
| C1   | N3   | N2   | 104.08(19) | C1   | N4   | N1   | 102.8(2)   |
| O3   | N9   | N10  | 116.42(18) | N3   | C1   | N5   | 124.2(2)   |
| O2   | N9   | O3   | 119.0(2)   | N3   | C1   | N4   | 113.4(2)   |
| O2   | N9   | N10  | 124.60(19) | N4   | C1   | N5   | 122.4(2)   |
| C3   | N6   | N5   | 101.23(19) | N7   | C3   | N10  | 113.8(2)   |
| N9   | N10  | C3   | 117.8(2)   | N6   | C3   | N7   | 115.7(2)   |
| C1   | N5   | N6   | 120.36(18) | N6   | C3   | N10  | 130.4(2)   |
| C2   | N5   | N6   | 110.02(18) | N7   | C2   | N5   | 109.41(19) |
| C2   | N5   | C1   | 129.04(19) | N7   | C2   | N8   | 126.4(2)   |
| N2   | N1   | N4   | 110.41(18) | N8   | C2   | N5   | 124.1(2)   |

**Table S8.** Torsion angles [°] for 4·H<sub>2</sub>O.

| <b>A</b> | <b>B</b> | <b>C</b> | <b>D</b> | <b>Angle/°</b> | <b>A</b> | <b>B</b> | <b>C</b> | <b>D</b> | <b>Angle/°</b> |
|----------|----------|----------|----------|----------------|----------|----------|----------|----------|----------------|
| O3       | N9       | N10      | C3       | -177.2(2)      | N2       | N1       | N4       | C1       | 0.2(2)         |
| O2       | N9       | N10      | C3       | 2.2(3)         | N4       | N1       | N2       | N3       | -0.2(2)        |
| N9       | N10      | C3       | N7       | 177.53(18)     | C1       | N3       | N2       | N1       | 0.1(2)         |
| N9       | N10      | C3       | N6       | 0.8(4)         | C1       | N5       | C2       | N7       | 172.1(2)       |
| N6       | N5       | C1       | N3       | -5.7(3)        | C1       | N5       | C2       | N8       | -9.3(4)        |
| N6       | N5       | C1       | N4       | 173.6(2)       | C3       | N7       | C2       | N5       | -0.6(2)        |
| N6       | N5       | C2       | N7       | 0.9(3)         | C3       | N7       | C2       | N8       | -179.1(2)      |
| N6       | N5       | C2       | N8       | 179.5(2)       | C3       | N6       | N5       | C1       | -172.87(19)    |
| N5       | N6       | C3       | N7       | 0.5(3)         | C3       | N6       | N5       | C2       | -0.8(2)        |
| N5       | N6       | C3       | N10      | 177.1(2)       | C2       | N7       | C3       | N6       | 0.0(3)         |
| N1       | N4       | C1       | N3       | -0.2(2)        | C2       | N7       | C3       | N10      | -177.16(18)    |
| N1       | N4       | C1       | N5       | -179.63(19)    | C2       | N5       | C1       | N3       | -176.1(2)      |
| N2       | N3       | C1       | N5       | 179.51(19)     | C2       | N5       | C1       | N4       | 3.2(3)         |
| N2       | N3       | C1       | N4       | 0.1(3)         |          |          |          |          |                |

**Table S9.** Hydrogen bonds for 4·H<sub>2</sub>O [Å and °].

| D   | H    | A               | d(D-H)/Å | d(H-A)/Å | d(D-A)/Å | D-H-A/° |
|-----|------|-----------------|----------|----------|----------|---------|
| O1  | H1   | N3              | 0.84     | 1.83     | 2.645(3) | 164.2   |
| N8  | H8A  | O2 <sup>1</sup> | 0.88     | 2.10     | 2.934(3) | 156.9   |
| N8  | H8B  | N4              | 0.88     | 2.24     | 2.859(3) | 126.9   |
| N12 | H12A | N7 <sup>2</sup> | 0.88     | 2.01     | 2.877(3) | 165.3   |
| N12 | H12B | O1 <sup>3</sup> | 0.88     | 2.29     | 2.995(3) | 136.9   |
| N12 | H12C | O2              | 0.94(2)  | 2.10(3)  | 2.696(3) | 120(2)  |
| N12 | H12C | N6              | 0.94(2)  | 1.99(2)  | 2.890(3) | 161(3)  |
| O4  | H4   | O5              | 0.84     | 1.77     | 2.596(3) | 169.7   |
| N11 | H11A | N1 <sup>4</sup> | 0.89     | 1.99     | 2.847(3) | 163.0   |
| N11 | H11B | O3              | 0.89     | 1.88     | 2.733(3) | 159.9   |
| N11 | H11C | O1 <sup>1</sup> | 0.95(3)  | 2.18(3)  | 2.940(3) | 136(2)  |
| O5  | H5A  | N2 <sup>1</sup> | 0.87     | 2.01     | 2.872(3) | 168.8   |
| O5  | H5B  | N4 <sup>4</sup> | 0.87     | 2.10     | 2.902(3) | 152.7   |

<sup>1</sup>-1+X,1-Y,-1/2+Z; <sup>2</sup>1+X,1-Y,1/2+Z; <sup>3</sup>-1+X,+Y,+Z; <sup>4</sup>-1/2+X,-1/2+Y,+Z.

## General methods

All the reagents used in this work were purchased in analytical grade and were used without further purification.  $^1\text{H}$  and  $^{13}\text{C}$  signals are recorded on a Bruker 500 MHz nuclear magnetic resonance (NMR) spectrometer by using  $\text{DMSO-}d_6$ . The onset decomposition temperature was measured by using a differential scanning calorimeter (DSC25) at a heat rating of  $5\text{ }^\circ\text{C min}^{-1}$ . Infrared (IR) spectra was recorded on a PerkinElmer Spectrum BX FT-IR instrument equipped with an ATR unit at  $25\text{ }^\circ\text{C}$ . Analyses of C/H/N were performed with a Vario EL III Analyzer. The impact sensitivity and friction sensitivity were measured by using a BAM Fallhammer and a BAM friction tester, respectively.

## Computational methods

The gas phase enthalpies of formation were calculated based on the G2 method. The solid-state heat of formation (for **3**) was calculated based on Trouton's rule according to eq 1 ( $T$  represents either the melting point or the decomposition temperature when no melting occurs prior to decomposition). The gas phase enthalpy of formation and heat of sublimation of **3** are  $588.62\text{ kJ mol}^{-1}$  and  $78.58\text{ kJ mol}^{-1}$ , respectively.

$$\Delta H_{sub} = 188/\text{Jmol}^{-1}\text{K}^{-1} \times T \quad (1)$$

For energetic salts (**4–11**), the solid-phase enthalpy of formation is obtained using a Born–Haber energy cycle (eq 2) and the relevant calculation formulas are shown below.

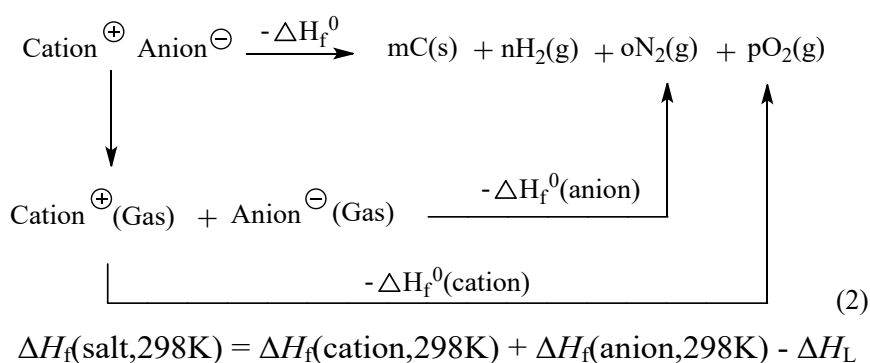

$$\Delta H_L = U_{\text{POT}} + [p(n_M/2 - 2) + q(n_X/2 - 2)]RT$$

$$U_{\text{POT}} (\text{kJ}\cdot\text{mol}^{-1}) = \gamma (\rho_m/M_m)^{1/3} + \delta$$

### Crystal detection methods

A suitable yellow block crystal (**3**·DMF) with dimensions  $0.22 \times 0.15 \times 0.07 \text{ mm}^3$  or a suitable yellow needle crystal (**4**·H<sub>2</sub>O) with dimensions  $0.37 \times 0.14 \times 0.26 \text{ mm}^3$  was selected and mounted on a nylon loop with paratone oil on a Bruker D8 VENTURE diffractometer. The crystals were kept at a steady  $T = 193 \text{ K}$  during data collection. The structures were solved with the olex2.solve structure solution program using Charge Flipping and refined with the SHELXL refinement package using Least Squares minimization.

### Calculation details for heats of formation

**Table S10.** Lattice energy for heat of formation.

| Compounds | $\Delta H_L$<br>(kJ/mol) | $\Delta H_f^{\text{Cation}}$<br>(kJ/mol) | $\Delta H_f^{\text{anion}}$<br>(kJ/mol) | $\Delta H_f^{298}$<br>(kJ/mol) |
|-----------|--------------------------|------------------------------------------|-----------------------------------------|--------------------------------|
| <b>4</b>  | 1374.8                   | 669.5                                    | 486.1                                   | 450.4                          |
| <b>5</b>  | 1363.5                   | 770.0                                    | 486.1                                   | 662.6                          |
| <b>6</b>  | 1407.8                   | 626.4                                    | 486.1                                   | 331.2                          |
| <b>7</b>  | 1594.7                   | 501.1                                    | 486.1                                   | -106.4                         |
| <b>8</b>  | 1230.9                   | 575.9                                    | 486.1                                   | 407.0                          |
| <b>9</b>  | 1238.9                   | 667.4                                    | 486.1                                   | 582.0                          |
| <b>10</b> | 1171.2                   | 774.8                                    | 486.1                                   | 864.5                          |
| <b>11</b> | 1191.9                   | 806.3                                    | 486.1                                   | 906.8                          |

## NMR plots

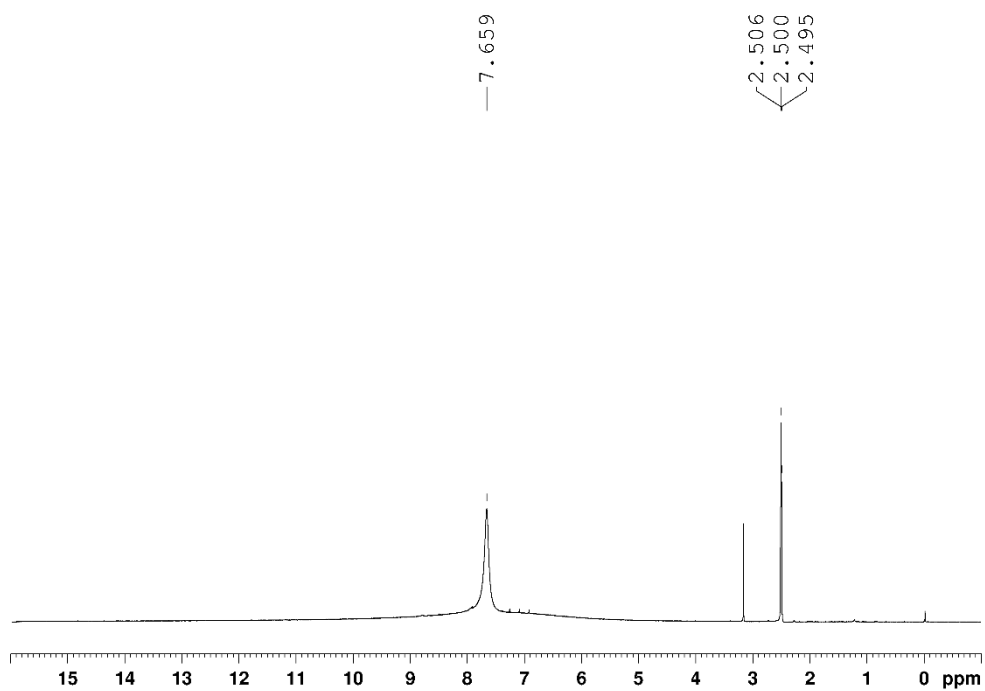

Figure S1.  $^1\text{H}$  NMR spectrum of **3**.

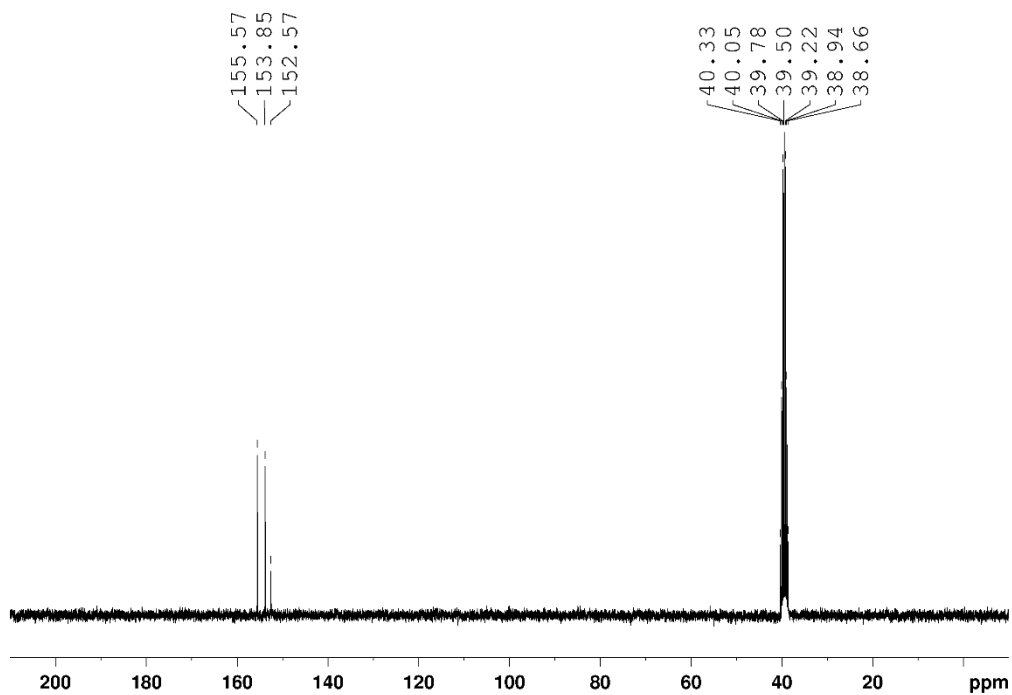

Figure S2.  $^{13}\text{C}$  NMR spectrum of **3**.

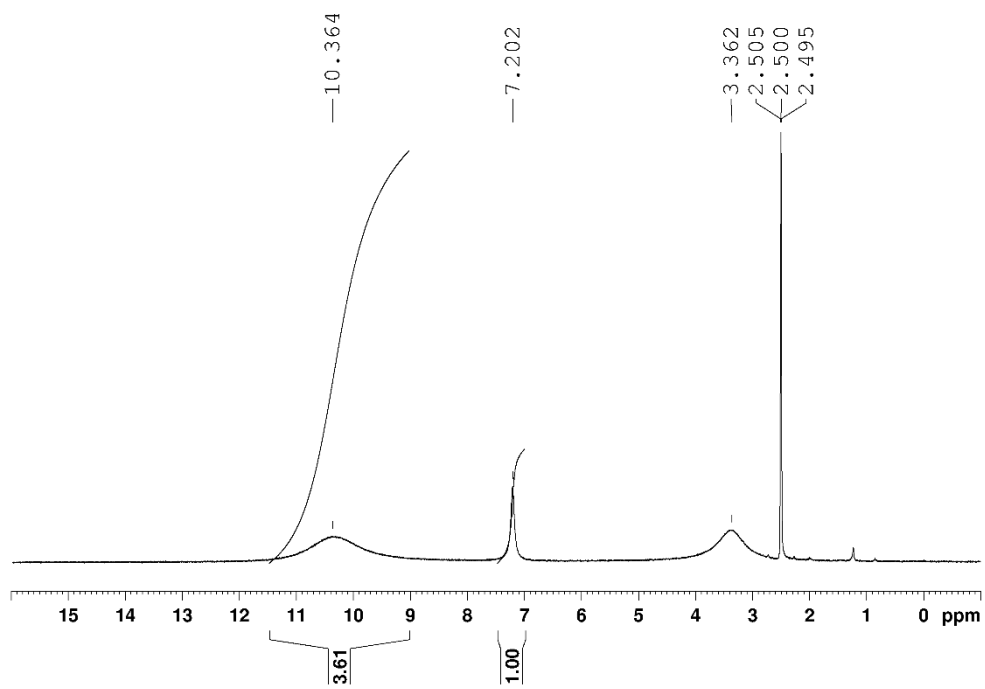

Figure S3.  $^1\text{H}$  NMR spectrum of **4**.

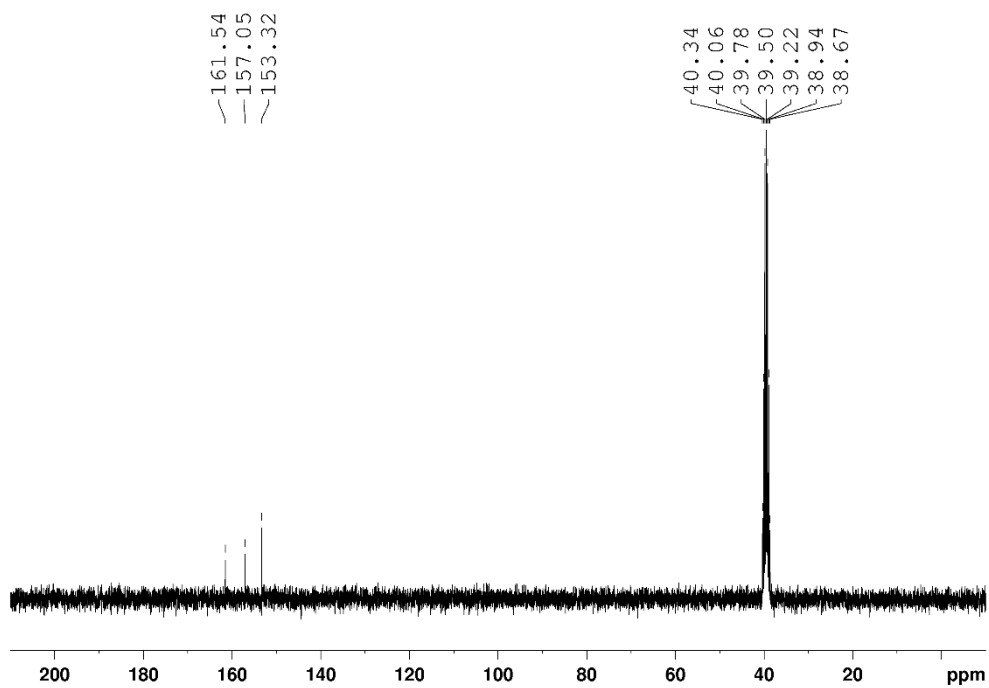

Figure S4.  $^{13}\text{C}$  NMR spectrum of **4**.

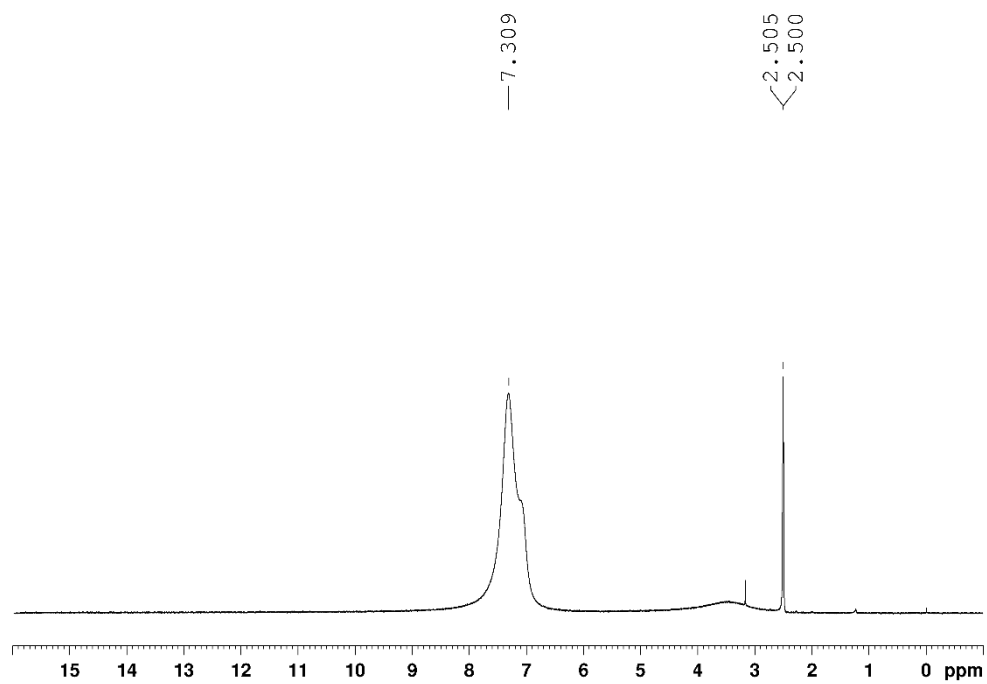

Figure S5.  $^1\text{H}$  NMR spectrum of **5**.

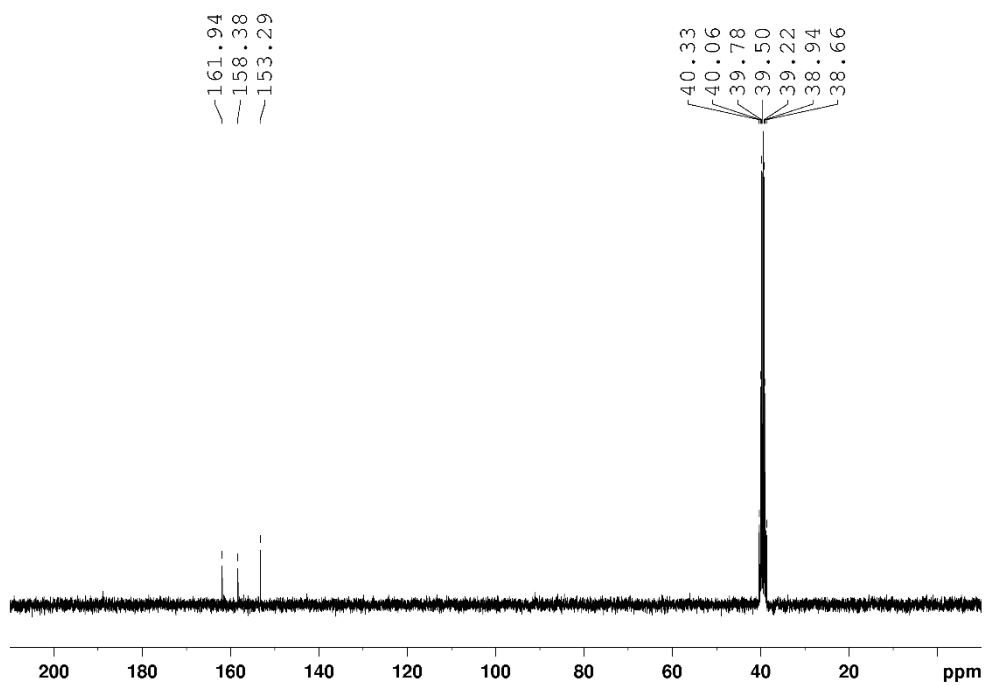

Figure S6.  $^{13}\text{C}$  NMR spectrum of **5**.



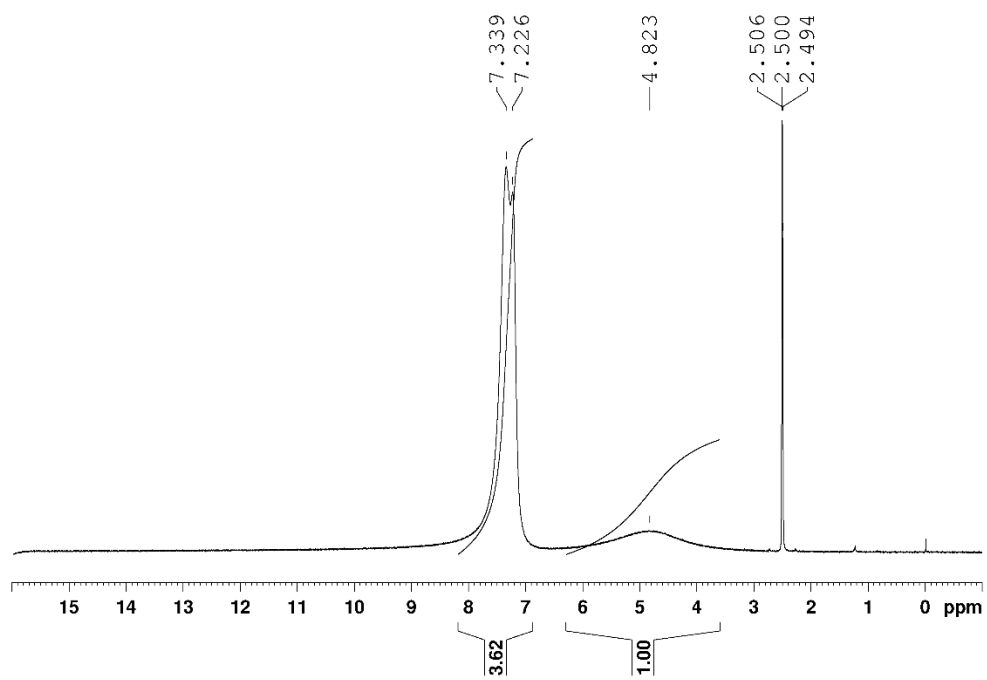

Figure S7.  $^1\text{H}$  NMR spectrum of **6**.

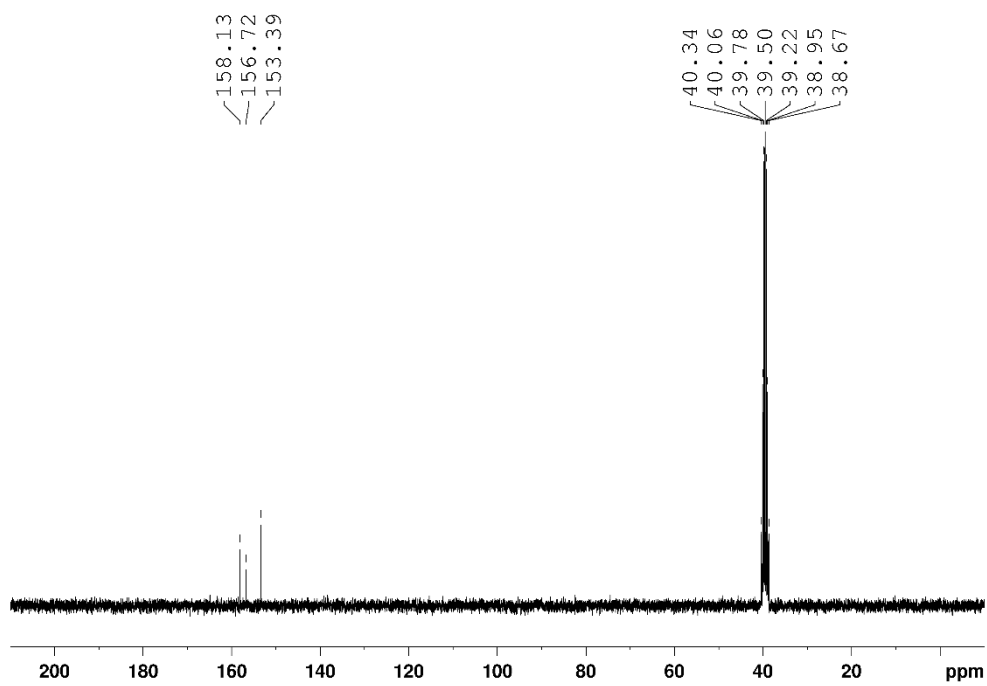

Figure S8.  $^{13}\text{C}$  NMR spectrum of **6**.

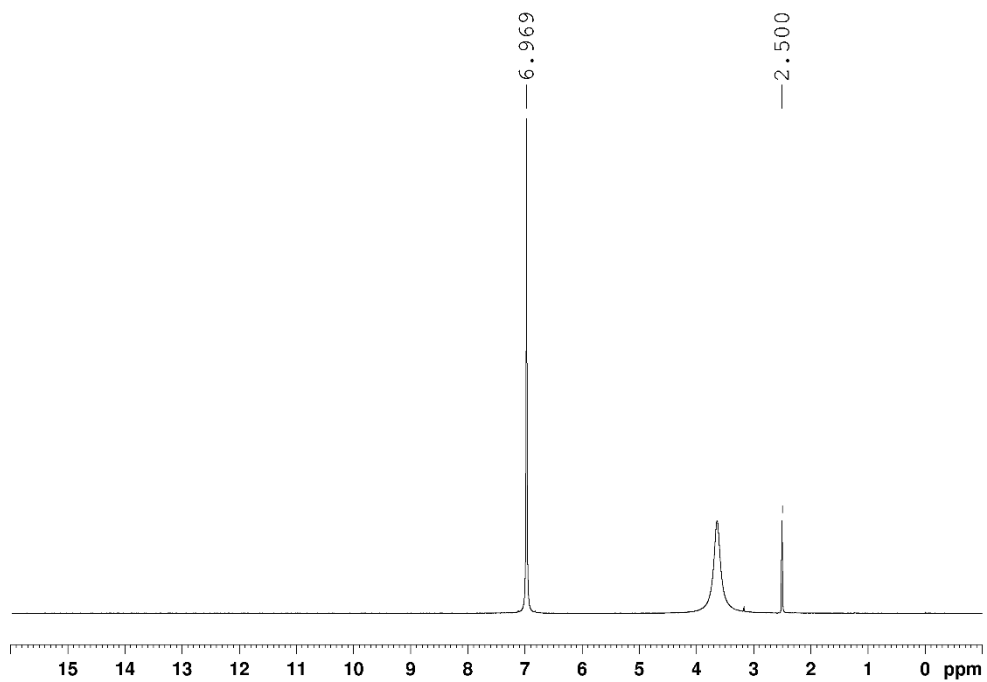

Figure S9. <sup>1</sup>H NMR spectrum of 7.

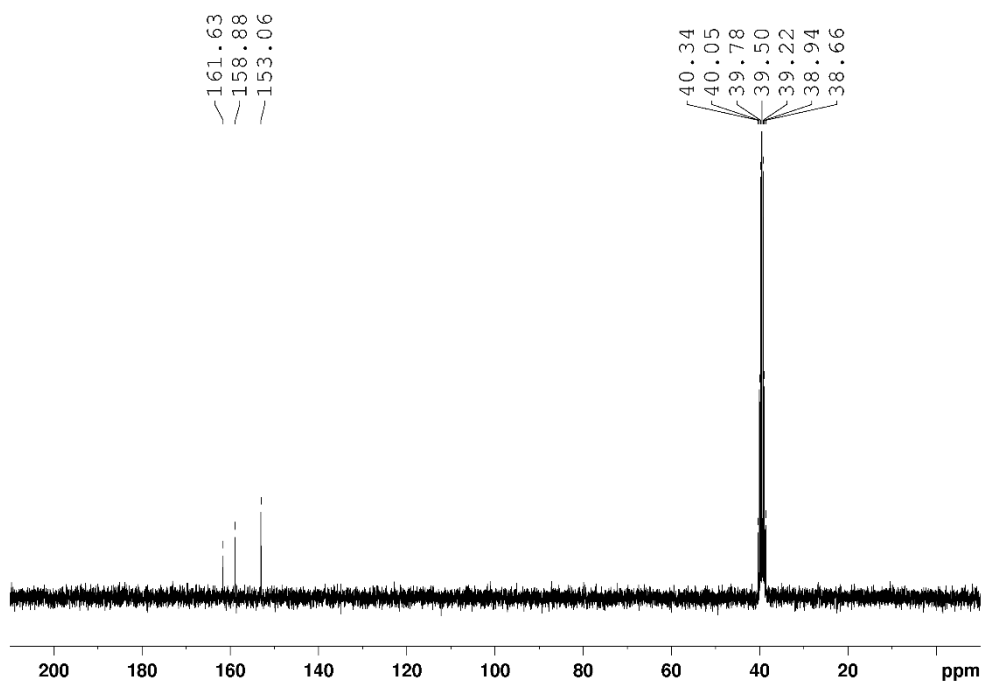

Figure S10. <sup>13</sup>C NMR spectrum of 7.

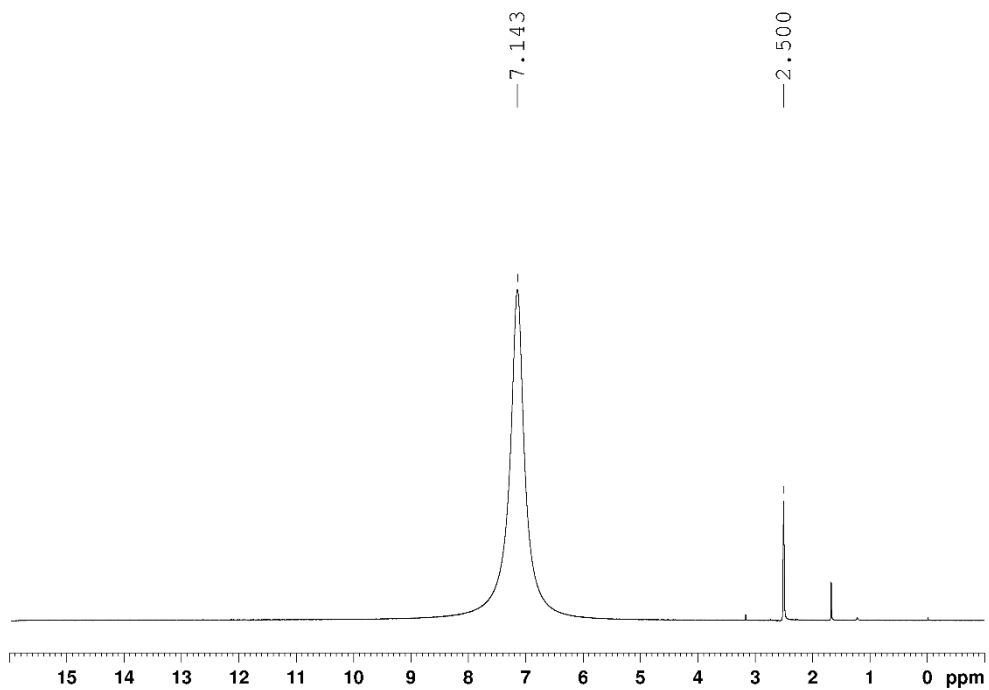

Figure S11.  $^1\text{H}$  NMR spectrum of **8**.

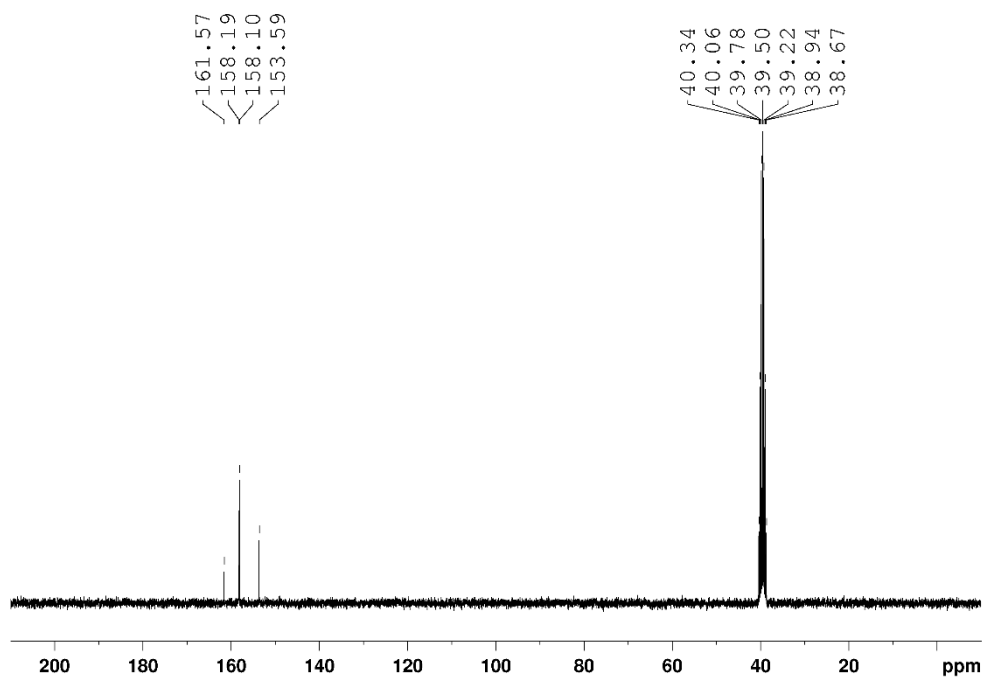

Figure S12.  $^{13}\text{C}$  NMR spectrum of **8**.

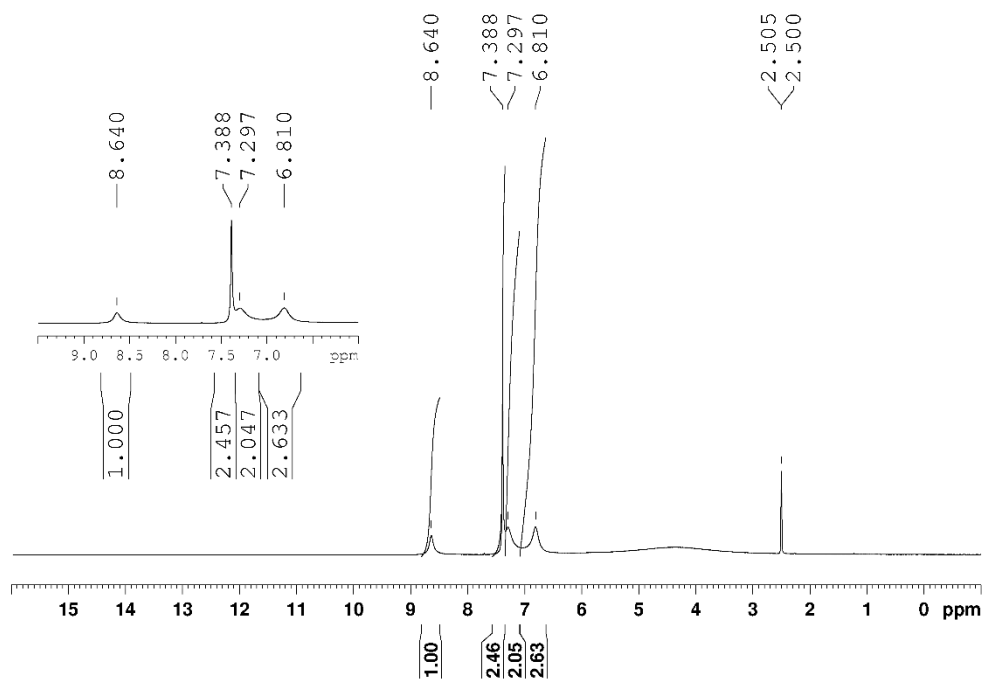

Figure S13.  $^1\text{H}$  NMR spectrum of **9**.

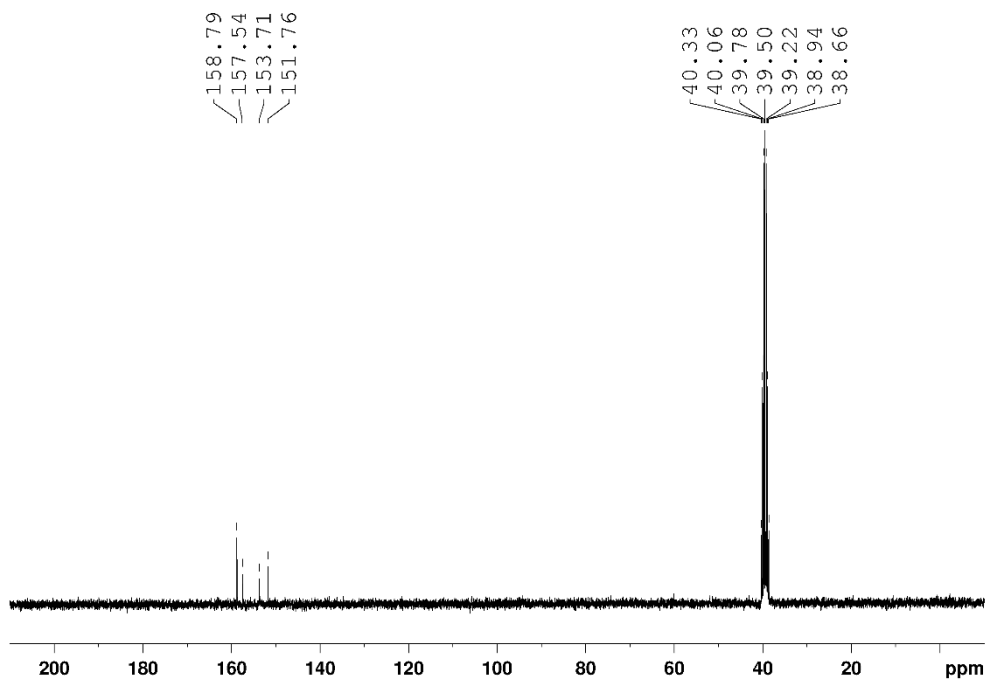

Figure S14.  $^{13}\text{C}$  NMR spectrum of **9**.

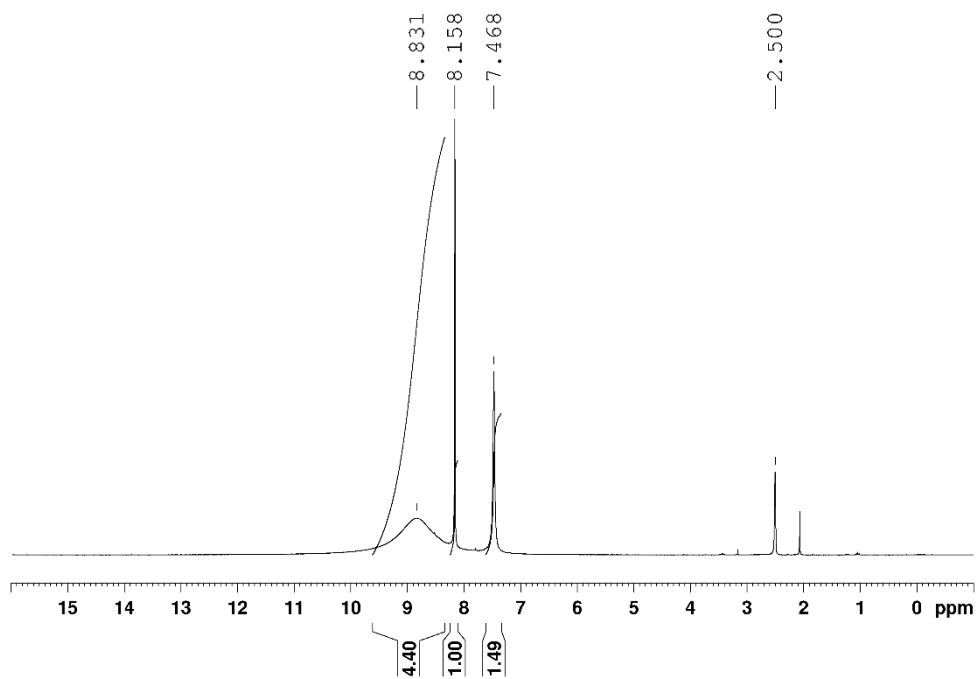

Figure S15.  $^1\text{H}$  NMR spectrum of **10**.

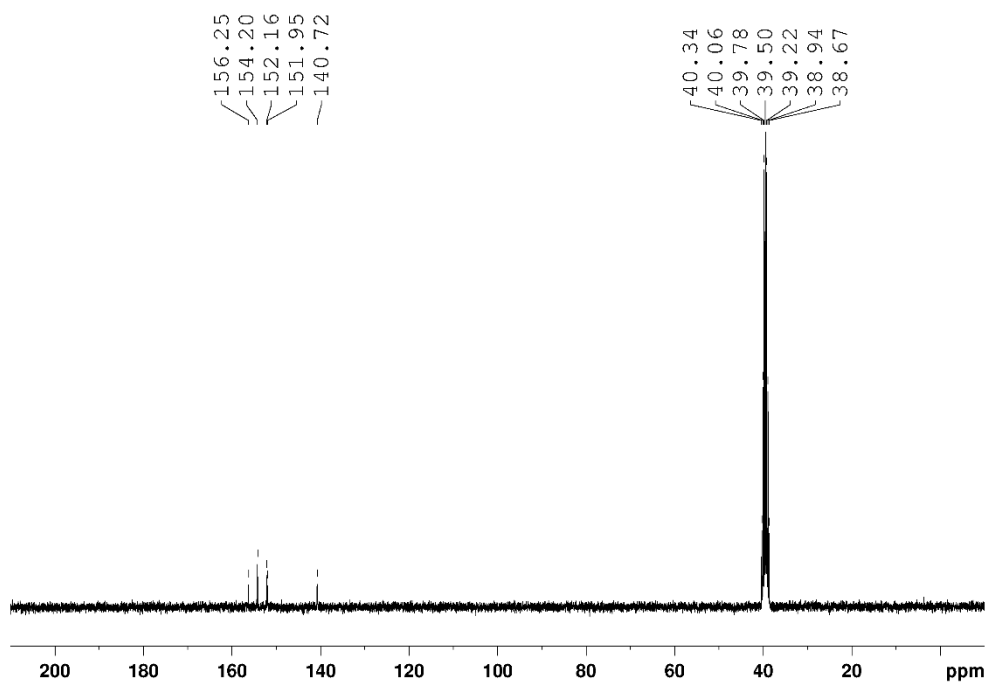

Figure S16.  $^{13}\text{C}$  NMR spectrum of **10**.

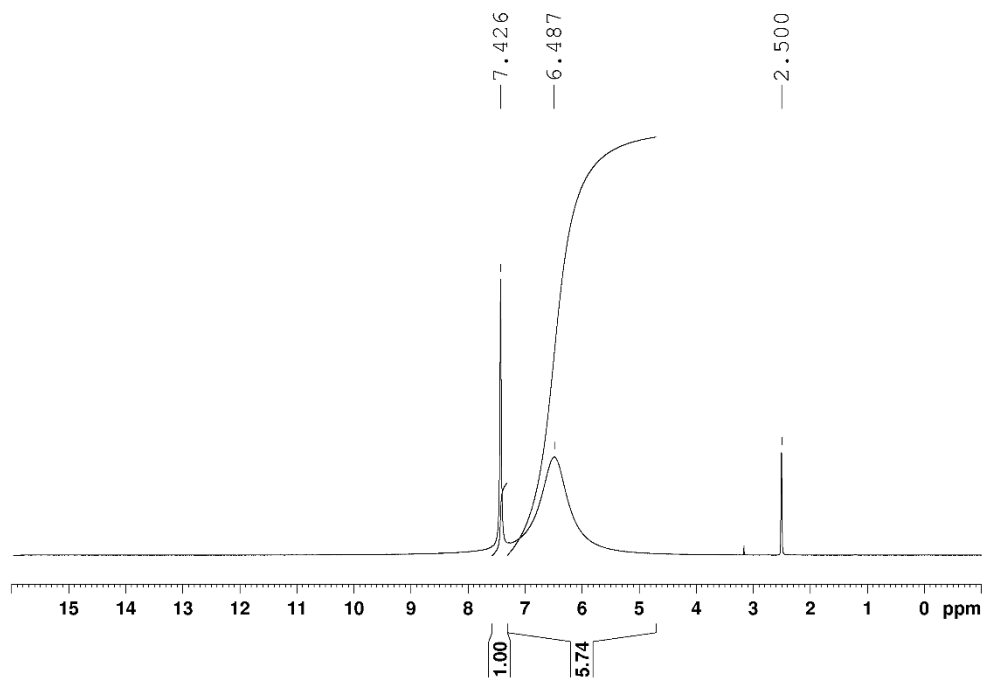

Figure S17.  $^1\text{H}$  NMR spectrum of **11**.

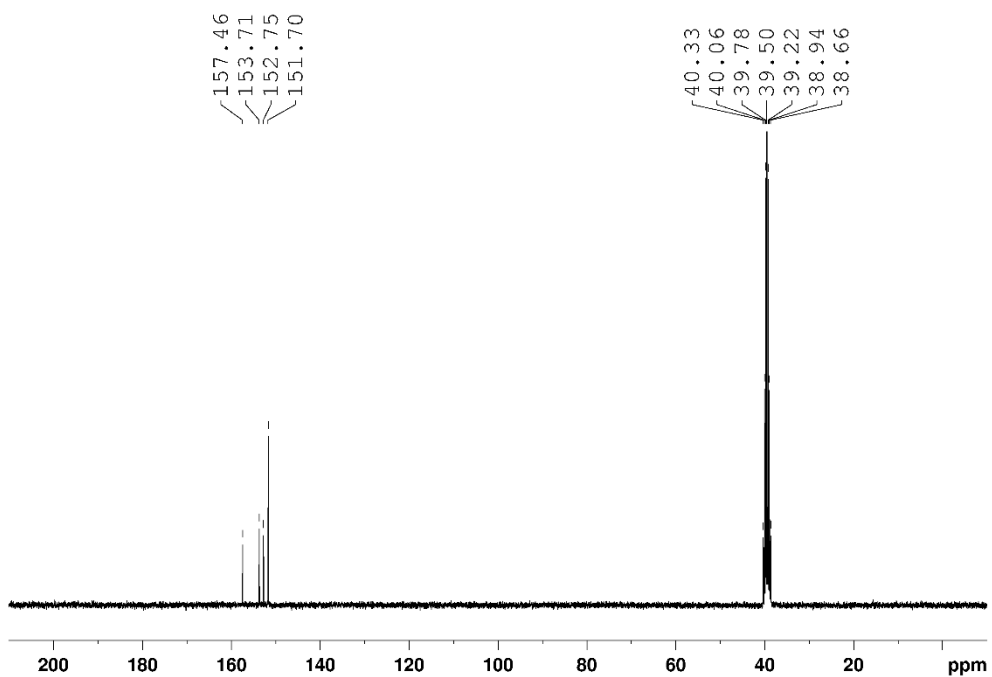

Figure S18.  $^{13}\text{C}$  NMR spectrum of **11**.

## DSC plots

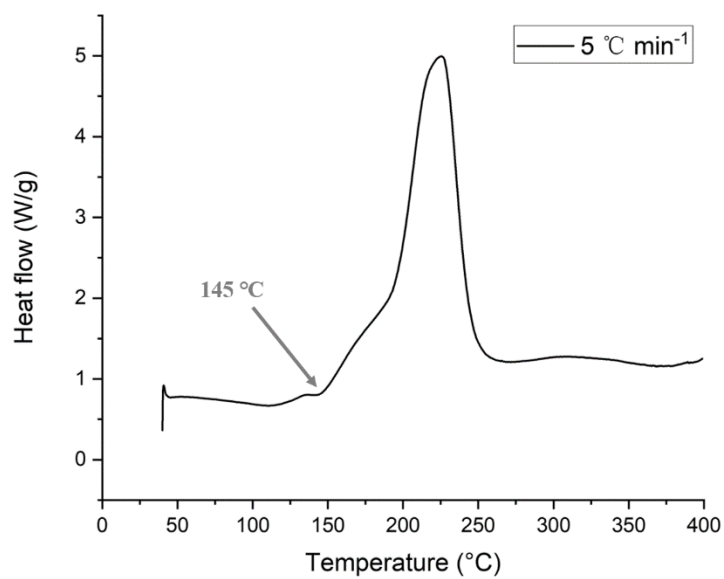

Figure S19. DSC plot of 3.

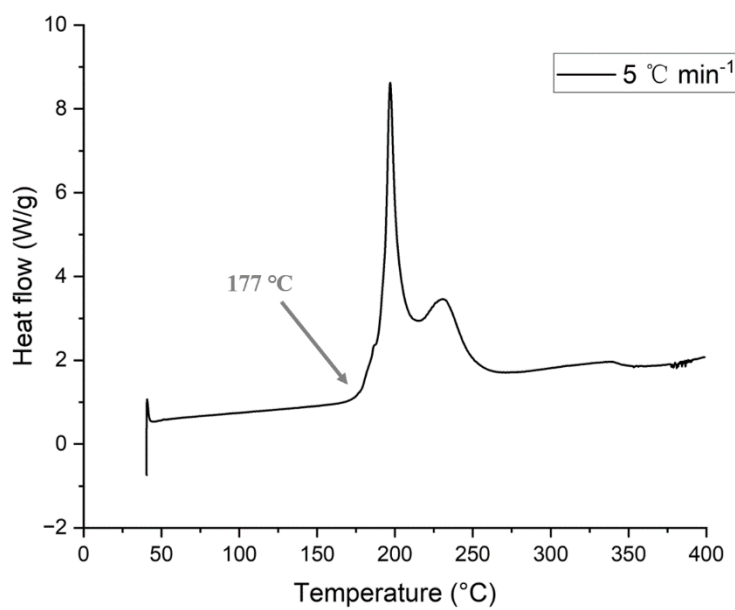

Figure S20. DSC plot of 4.

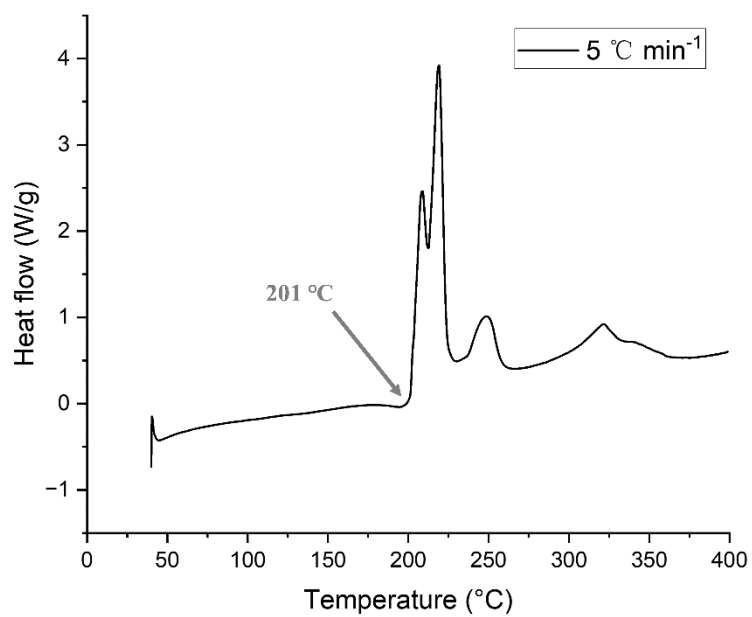

Figure S21. DSC plot of 5.

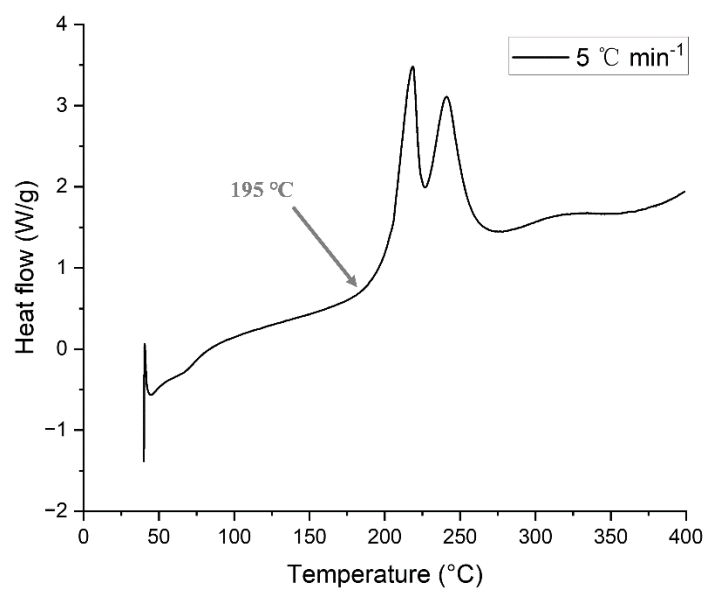

Figure S22. DSC plot of 6.



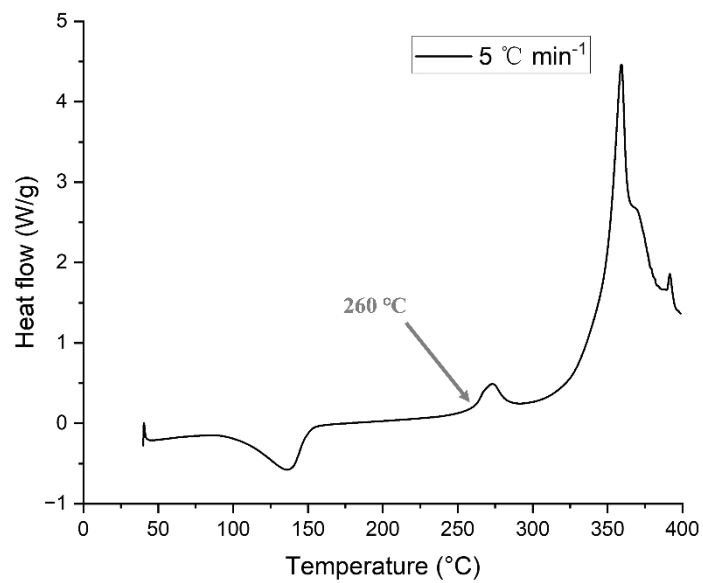

Figure S23. DSC plot of 7.

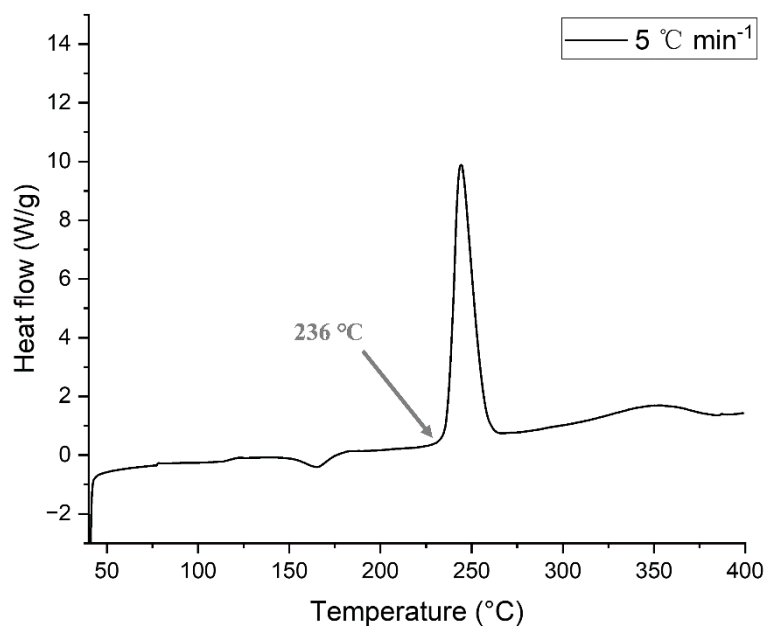

Figure S24. DSC plot of 8.

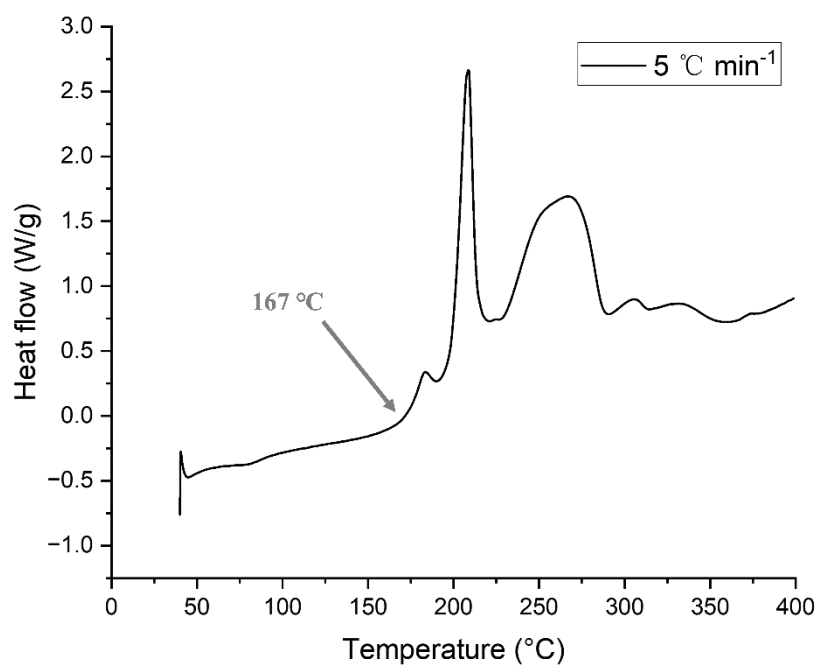

Figure S25. DSC plot of 9.

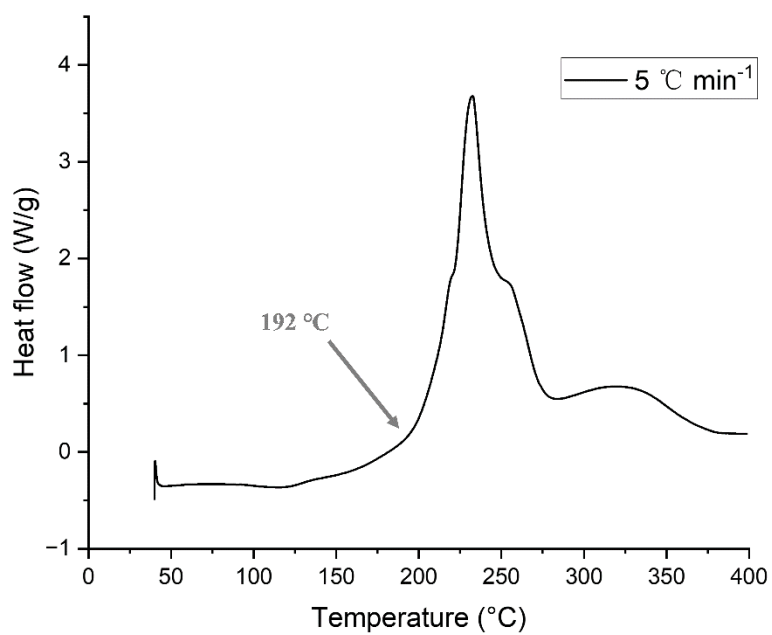

Figure S26. DSC plot of 10.

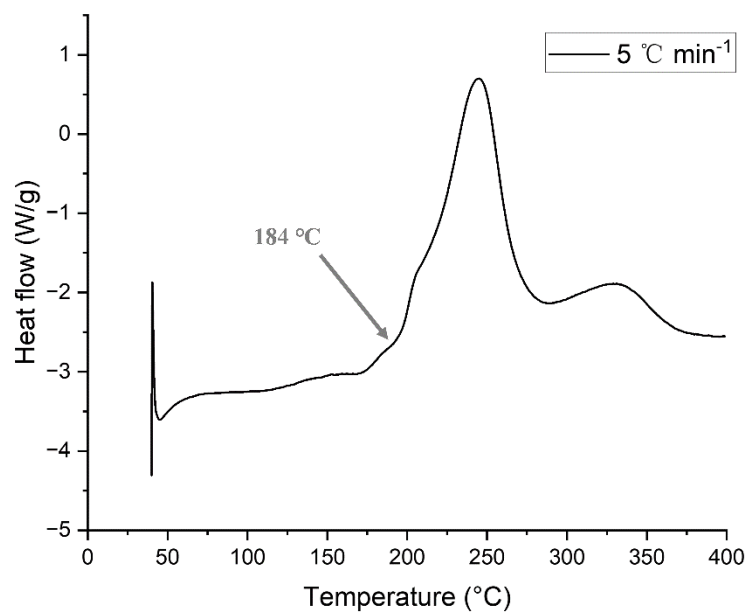

**Figure S27.** DSC plot of **11**.
